# Supplementary material
Source: PubMed Central journal article supplement (PMC5047111)
Supplement: supp_pp.16.01097_PP2016-01097DR1_Supplemental_Figures.pdf [file supp_pp.16.01097_PP2016-01097DR1_Supplemental_Figures.pdf]

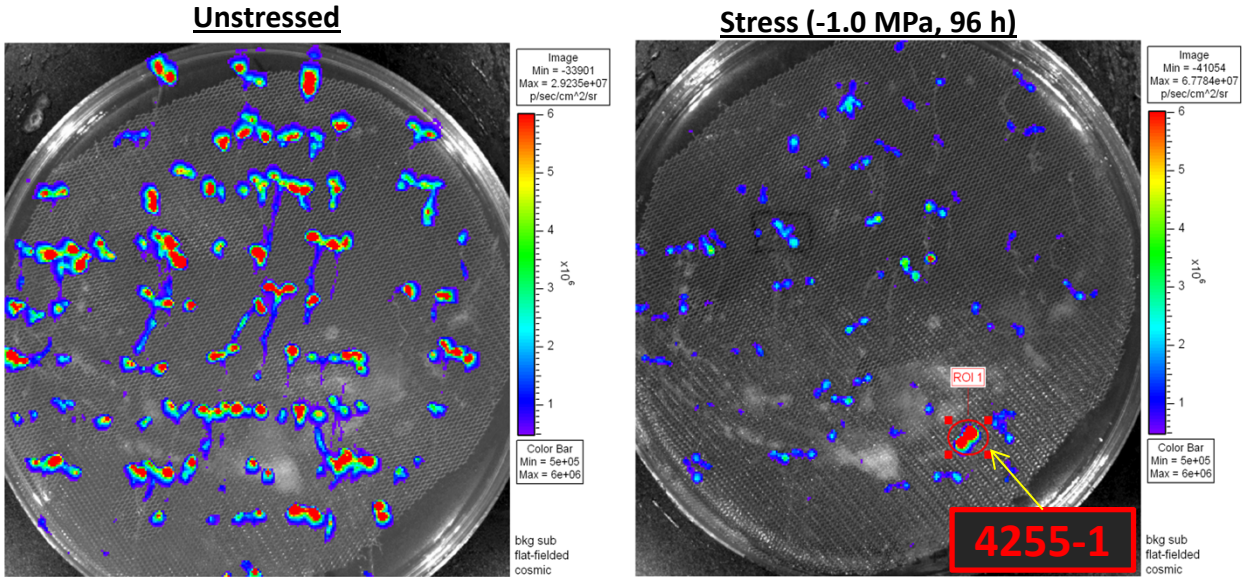

**Figure S1: Example of primary screen plate images using EMS mutagenized *PDH1<sub>pro</sub>::LUC2*.**

M<sub>2</sub> seeds were plated on half-strength MS media (no sugar, with MES buffer) overlaid with nylon mesh, stratified for 4 days and plates placed vertically in a growth chamber and seedlings allowed to grow seven days. Plates were then imaged and the seedlings transferred to PEG-agar plates using the nylon mesh. Seedlings were then imaged again at 96 h after transfer. Seedlings having either low *PDH1<sub>pro</sub>::LUC2* activity before stress (not seen in this example plate) or high *PDH1<sub>pro</sub>::LUC2* after stress (as seen here for mutant 4255-1) were transferred to soil. All such putative mutants were rescreened in the subsequent generation and those having reproducible alterations in *PDH1<sub>pro</sub>::LUC2* activity retained for further characterization.

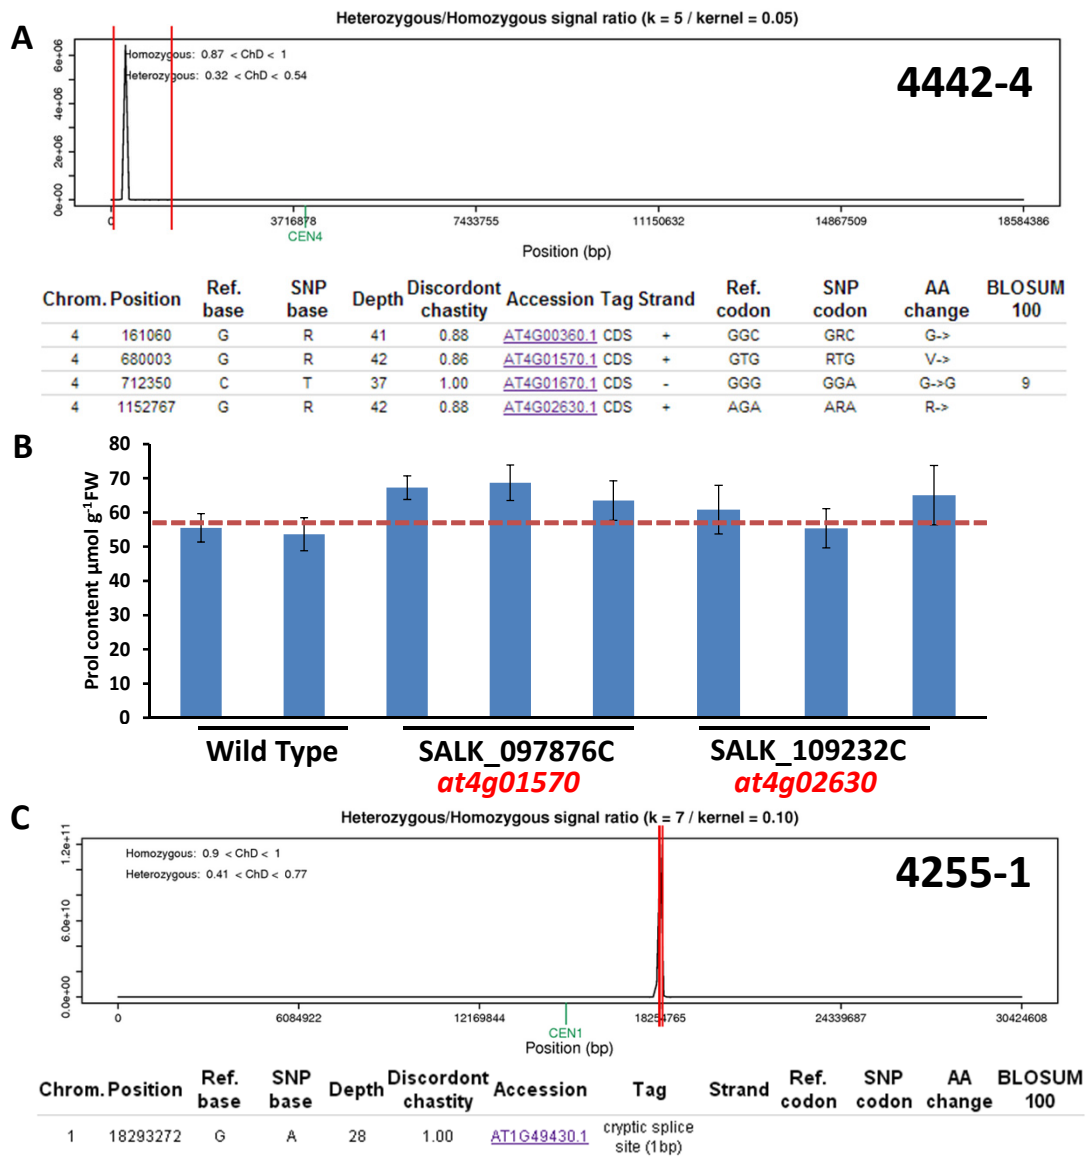

**Figure S2: Identification of *CYP86A2* and *LACS2* as the causative mutated genes in the 4442-2 and 4255-1 EMS mutants**

- Next Generation Mapping (NGM) output for 4442-4 showing four candidate genes.
- Analysis of proline accumulation at -1.2 MPa for two of the candidate genes identified in A found no significant increase in proline level compared to wild type. The multiple data points for each mutant are for seed of individual homozygous plants and stocks of Col-0 wild type grown at the same time as the mutants. Data are means  $\pm$  S.E. (n = 6-9).
- NGM output for 4255-1 showing *LACS2* as the main candidate gene.

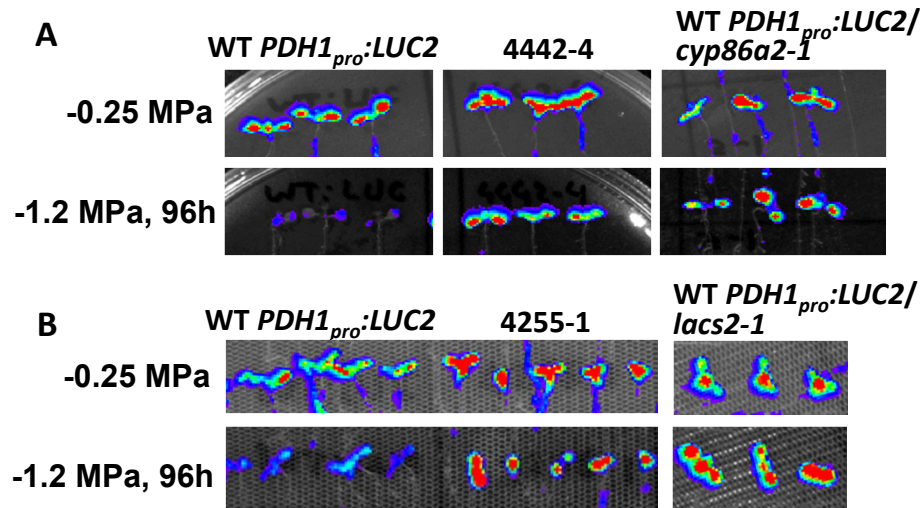

Figure S3: *PDH1<sub>pro</sub>:LUC2* crossed to *cyp86a2-1* and *lacs2-1* T-DNA mutants shows the same high *PDH1<sub>pro</sub>:LUC2* phenotype as the 4244-2 and 4255-2 EMS mutants

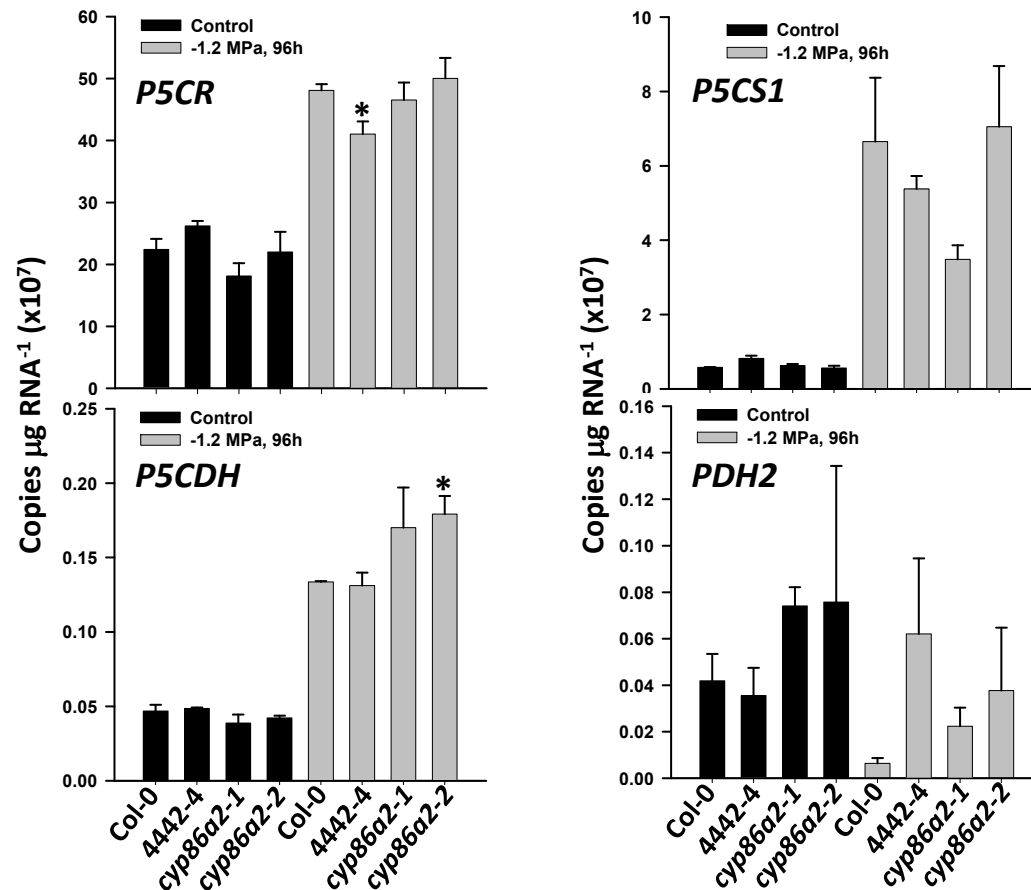

Figure S4: Expression of proline synthesis and catabolism genes in *cyp86a2* mutants. Data are means  $\pm$  S.E. (n=3). Significant differences ( $p \geq 0.05$ ) compared to wild type in the same treatment are marked (\*).

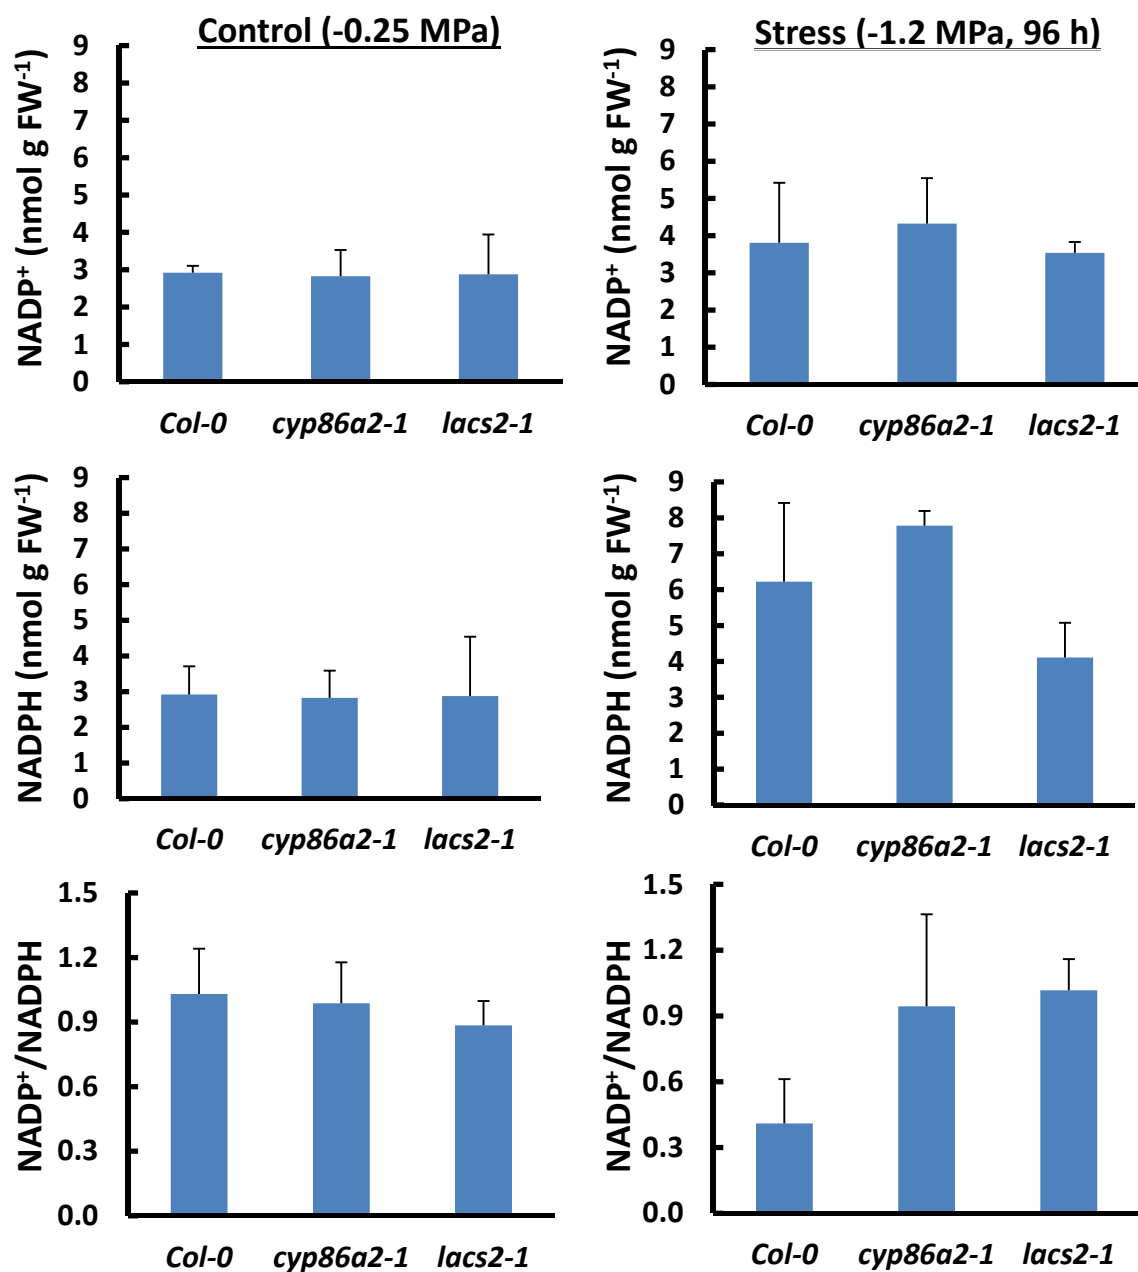

Figure S5: NADP<sup>+</sup> and NADPH analysis of wild type, *cyp86a2-1* and *lacs2-1*. Data are means  $\pm$  S.E. (n=2-6). There were no significant differences between mutants and wild type.

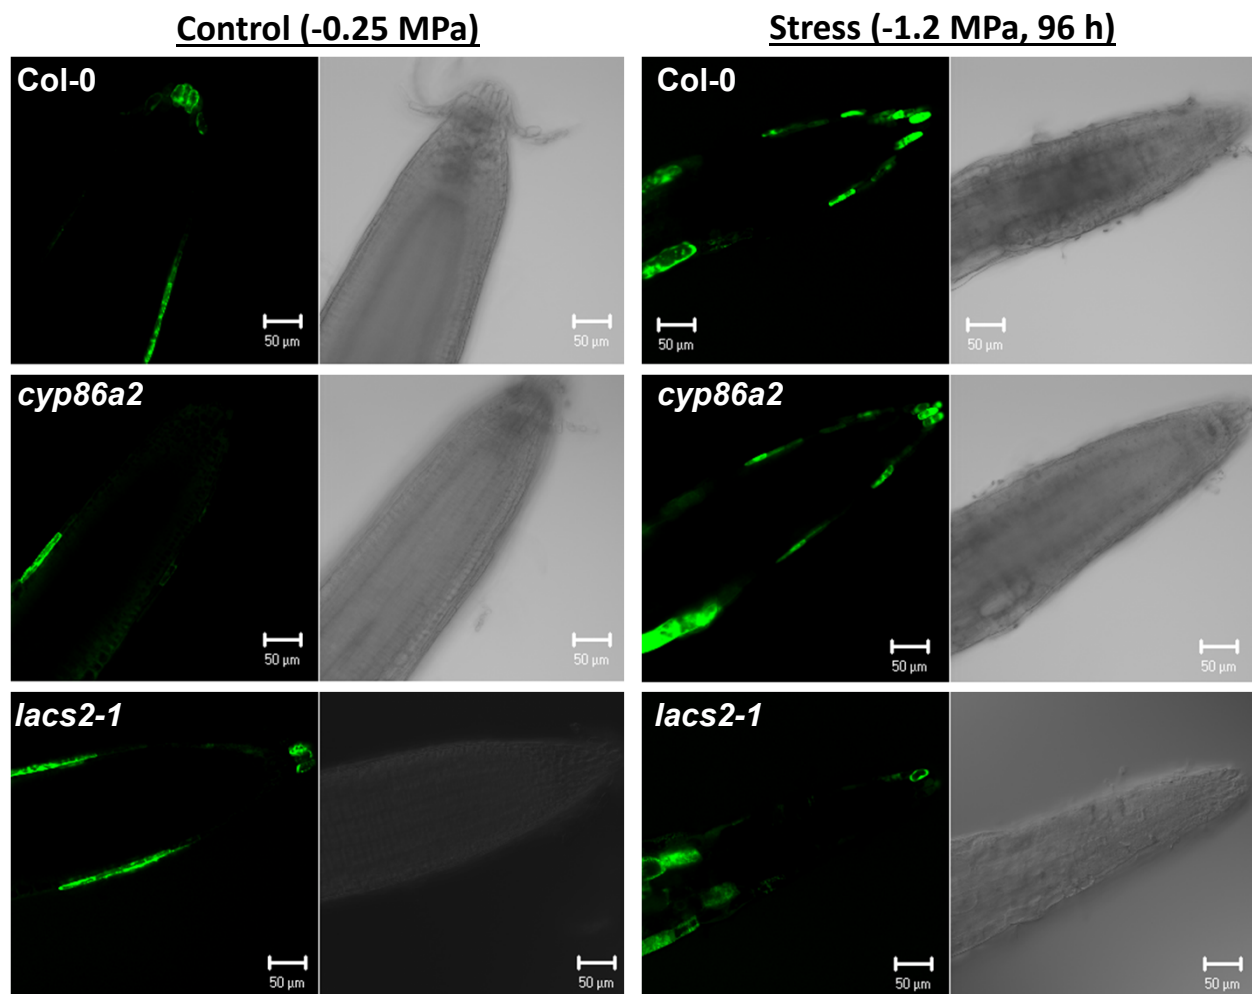

**Figure S6: ROS levels of wild type, *cyp86a2-1* and *lacs2-1*.** To investigate whether the mutants had greater overall ROS levels than wild type, plants were stained with the ROS sensitive dye H2DCFDA and root tips imaged. No substantial differences in H2DCFDA fluorescence was observed between wild type and mutants.

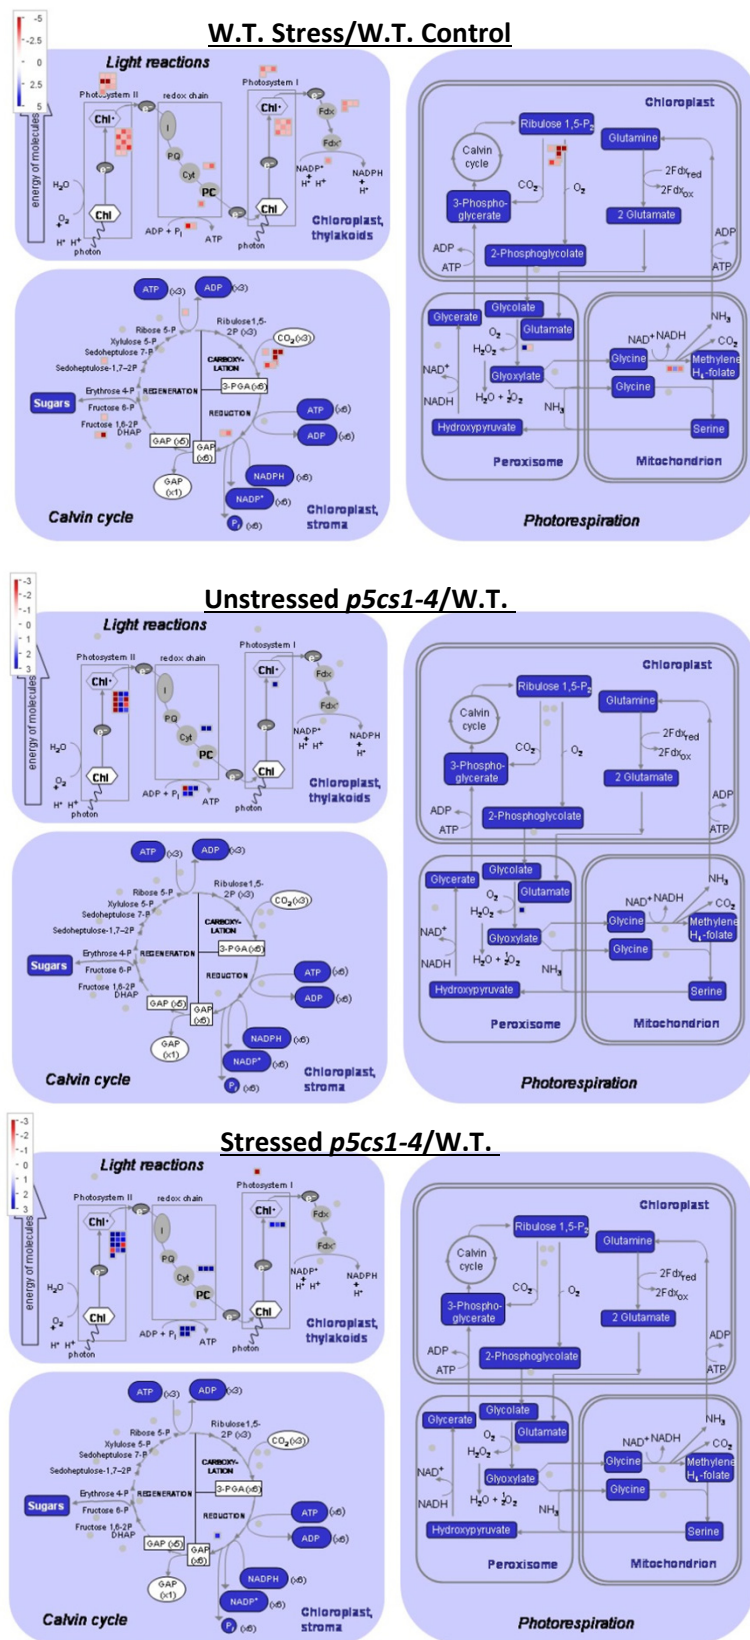

**Figure S7: MapMan analysis of photosynthesis-related gene expression in stress and control treated wild type as well as *p5cs1-4* compared to wild type in unstressed and low water potential (-1.2 MPa, 96 h) treatments.**

Knockout of *p5cs1-4* resulted in a distinctive effect of up and down regulation of genes involved in the light reactions and electron transport while no differences were seen in Calvin Cycle or Photorespiration-related genes. This pattern differed substantially from low water potential stress in wild type where genes in all branches of photosynthetic related metabolism were affected and most changes seen were down-regulation.

### W.T. Stress/W.T. Control

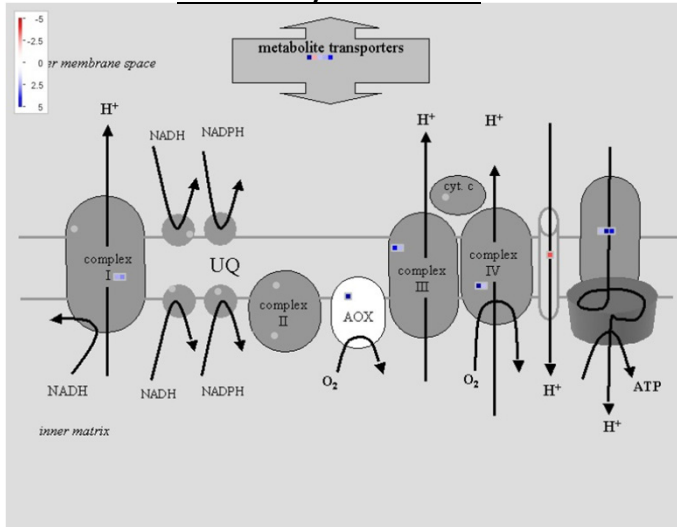

**Figure S8: MapMan analysis of mitochondrial electron transport-related gene expression in stress and control treated wild type as well as *p5cs1-4* compared to wild type in unstressed and low water potential (-1.2 MPa, 96 h) treatments.**

Knockout of *p5cs1-4* resulted in similar upregulation of many Complex I genes in both control and stress treatments. This pattern differed substantially from the effect of low water potential stress in wild type.

### Unstressed *p5cs1-4*/W.T.

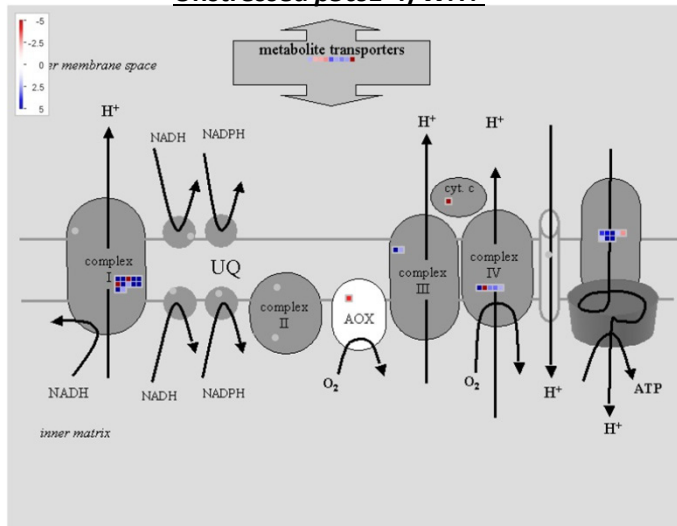

### Stressed *p5cs1-4*/W.T.

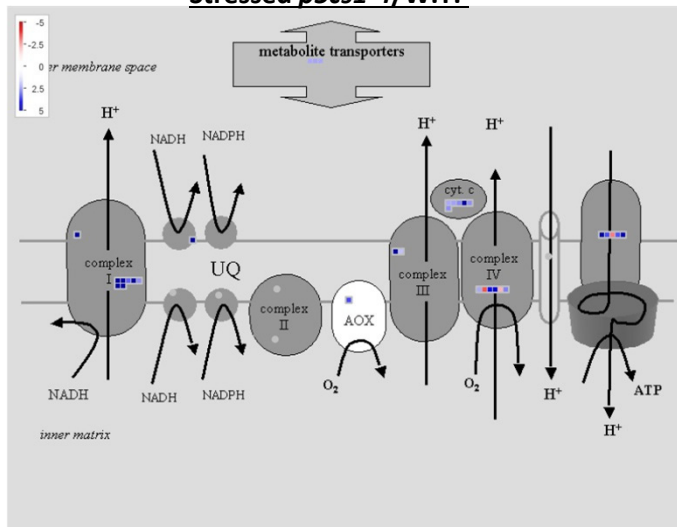

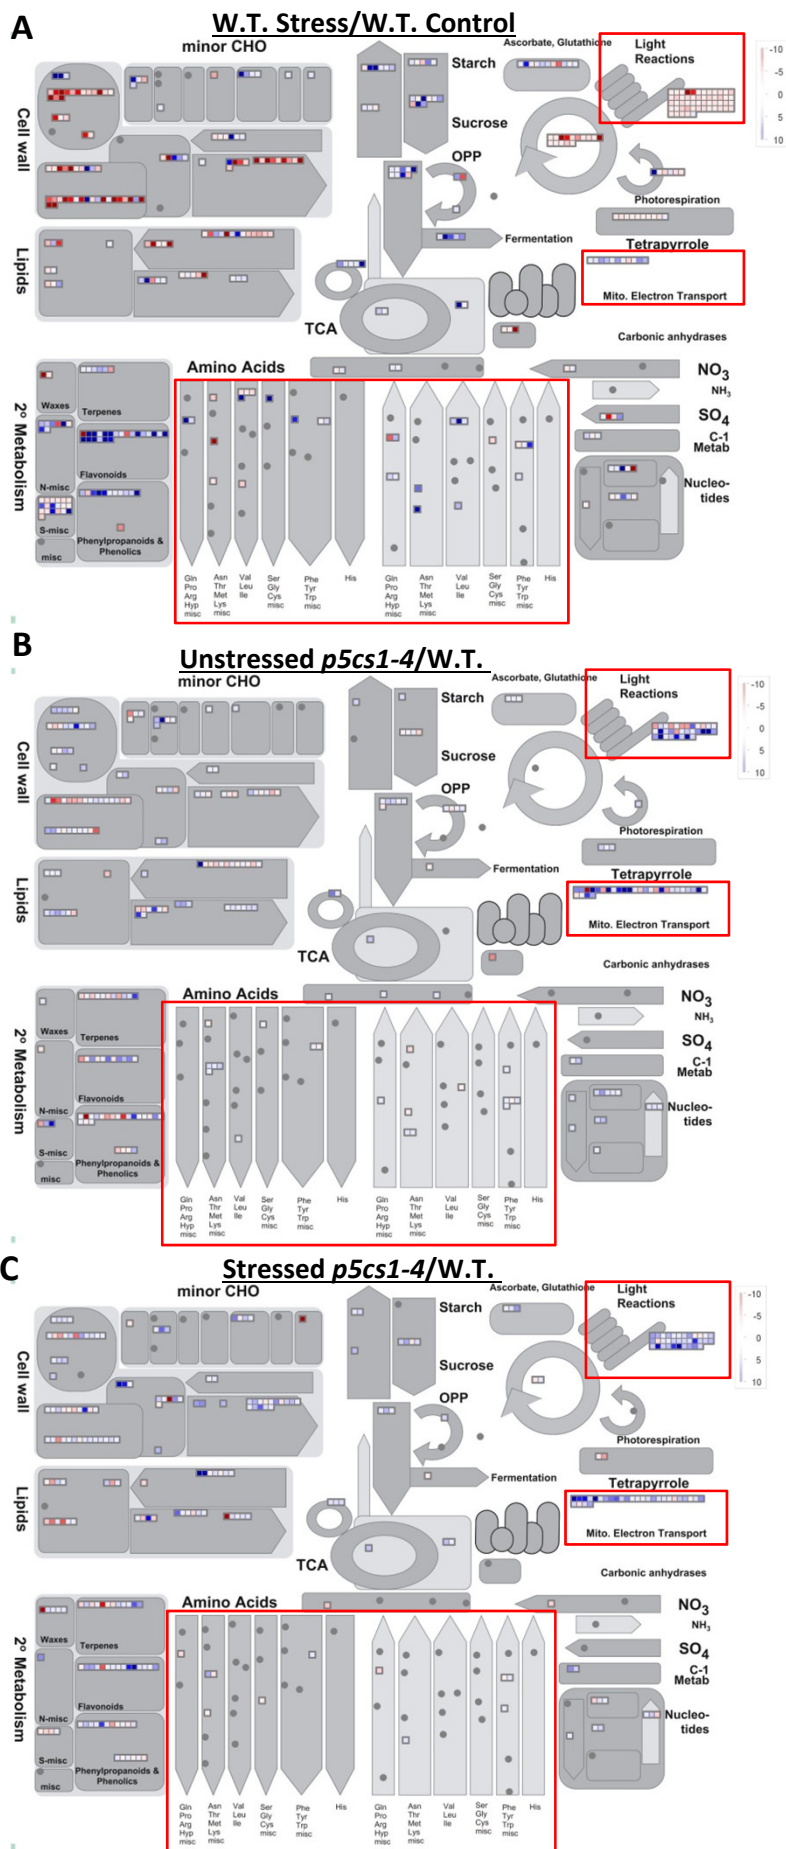

**Figure S9: MapMan analysis of amino acid metabolism-related gene expression in *p5cs1-4* compared to wild type in unstressed and low water potential (-1.2 MPa, 96 h) treatments.**

A. Wild type stress versus wild type control. The significantly up or down regulated genes (Tables S2 and S3) were used for analysis but using a 2-fold change for differentially expressed genes. This included 1981 genes with 411 metabolic related genes plotted on the general metabolic diagram shown here. Red boxes indicate metabolic processes of particular interest for comparison to *p5cs1-4* data (light reactions, mitochondria electron transport, amino acid metabolism).

B. Unstressed *p5cs1-4* compared to unstressed wild type. For MapMan analysis, all genes having fold change greater than 2-fold were included along with genes with reads in on sample but not the other which were found to be significant in the statistical analysis (Fig. 7A, Table S4 and S5). This included 3466 genes with 296 having metabolic functions displayed on this diagram.

C. Stressed *p5cs1-4* compared to stressed wild type. Genes for plotting on MapMan were selected as described for B and included 2672 genes with 284 metabolism-related plotted on this diagram.

For both B and C, note the limited number of amino acid metabolism genes found compared to the wild type stress versus control plot in A. Conversely, a larger number of genes related to light reactions and mitochondrial electron transport were found to have altered expression in *p5cs1-4* and the overall effect of *p5cs1-4* on their expression was dramatically different than the effect of stress on wild type.

Dataset: 3283 perturbations from data releases AT\_0001\_0001  
212 samples from gene set from p5cs1-4 control

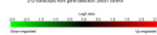

A

Arabidopsis thaliana (Top 50 most similar Perturbations)

lec1-1 / Ws-0  
phyA-L17 / Col-0  
heat study 7 / untreated cell suspension samples  
cop1-4 / Col-0  
pab2 pab8 / Col-0  
drought study 9 (35S::ABF3-48) / untreated 35S::ABF3-48 seedling samples (24h)  
CS57560 / Bay-0 parent  
pollen tube growth (semi in vivo) / pollen tube growth (in vitro)  
dexamethasone study 10 (Col) / untreated seedling samples (Col)  
cop1-4 / Col-0  
CS57561 / Bay-0 parent  
low light / 4°C (220-280min) / low light / 21°C (220-280min)  
stratification (1h) / seed desiccation  
cop1-4 / Col-0  
cop1-4 / Col-0  
lincomycin+R+B study 2 (0.5µmol m-2 s-1) / R+B study 2 (0.5µmol m-2 s-1)  
H. schachtii / non-infected root samples  
CS57645 / Bay-0 parent  
CS57631 / Bay-0 parent  
Se-0 / Mir-0/Se-0  
CS57670 / Bay-0 parent  
pollen tube growth (semi in vivo) / dry mature pollen samples  
CS57533 / Bay-0 parent  
CS57865 / Bay-0 parent  
CS57658 / Bay-0 parent  
MYB61 / Col-0  
CS57824 / Bay-0 parent  
sps1 / Col-0  
dexamethasone study 10 (35S:GR-REV\*) / untreated seedling samples (35S:GR-REV\*)  
CS57592 / Bay-0 parent  
mur4-1pr1 / Col-0  
CS57901 / Bay-0 parent  
CS57693 / Bay-0 parent  
CS57703 / Bay-0 parent  
dexamethasone study 12 (Col) / untreated seedling samples (Col)  
CS57917 / Bay-0 parent  
axr2-1 / Col-0  
CS57771 / Bay-0 parent  
2,4-D + trichostatin A (Ler) / 2,4-D study 2 (Ler)  
toc1-1 / C24\_CAB2::LUC\_CaMV35S::AEQ  
CS57530 / Bay-0 parent  
L-AOPP + IAA study 2 (4d) / mock treated Col-0 shoot apical meristem samples (4d)  
CS57896 / Bay-0 parent  
CS57640 / Bay-0 parent  
Mir-0 / Mir-0/Se-0  
Te-0 / Col-0  
CS57723 / Bay-0 parent  
CS57823 / Bay-0 parent  
CS57769 / Bay-0 parent

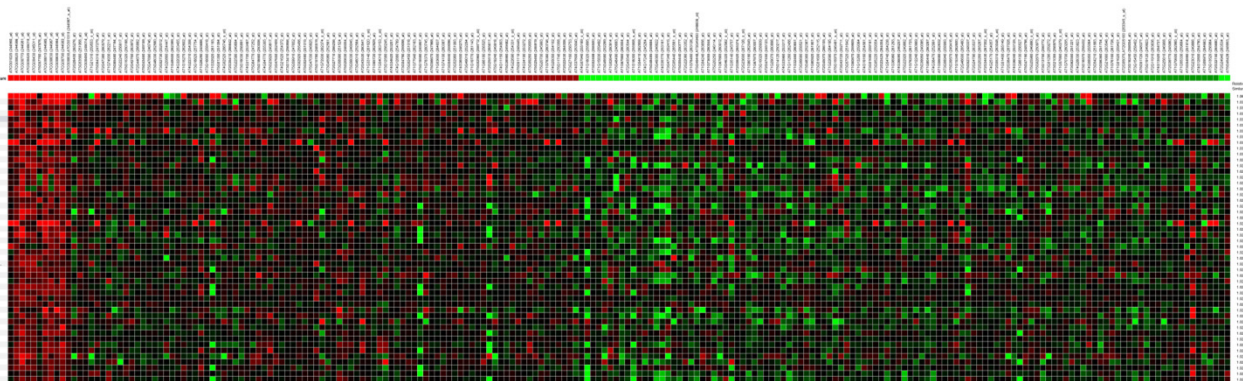

B

### Arabidopsis thaliana (Top 50 most similar Perturbations)

iron deficiency / protoplasting / iron deficiency study 8 (24h)  
lec1-1 / Ws-0  
phyA-L17 / Col-0  
heat study 7 / untreated cell suspension samples  
cop1-4 / Col-0  
pab2 pab8 / Col-0  
drought study 9 (35S::ABF3-48) / untreated 35S::ABF3-48 seedling samples (24h)  
CS57560 / Bay-0 parent  
pollen tube growth (semi in vivo) / pollen tube growth (in vitro)  
dexamethasone study 10 (Col) / untreated seedling samples (Col)  
cop1-4 / Col-0  
CS57561 / Bay-0 parent  
low light / 4°C (220-280min) / low light / 21°C (220-280min)  
stratification (1h) / seed desiccation  
cop1-4 / Col-0  
cop1-4 / Col-0  
lincomycin+R+B study 2 (0.5µmol m-2 s-1) / R+B study 2 (0.5µmol m-2 s-1)  
H. schachtii / non-infected root samples  
CS57645 / Bay-0 parent  
CS57631 / Bay-0 parent  
Se-0 / Mir-0/Se-0  
CS57670 / Bay-0 parent  
pollen tube growth (semi in vivo) / dry mature pollen samples  
CS57533 / Bay-0 parent  
CS57865 / Bay-0 parent  
CS57658 / Bay-0 parent  
MYB61 / Col-0  
CS57824 / Bay-0 parent  
sps1 / Col-0  
dexamethasone study 10 (35S:GR-REV\*) / untreated seedling samples (35S:GR-REV\*)  
CS57592 / Bay-0 parent  
mur4-1pr1 / Col-0  
CS57901 / Bay-0 parent  
CS57693 / Bay-0 parent  
CS57703 / Bay-0 parent  
dexamethasone study 12 (Col) / untreated seedling samples (Col)  
CS57917 / Bay-0 parent  
axr2-1 / Col-0  
CS57771 / Bay-0 parent  
2,4-D + trichostatin A (Ler) / 2,4-D study 2 (Ler)  
toc1-1 / C24\_CAB2::LUC\_CaMV35S::AEQ  
CS57530 / Bay-0 parent  
L-AOPP + IAA study 2 (4d) / mock treated Col-0 shoot apical meristem samples (4d)  
CS57896 / Bay-0 parent  
CS57640 / Bay-0 parent  
Mir-0 / Mir-0/Se-0  
Te-0 / Col-0  
CS57723 / Bay-0 parent  
CS57823 / Bay-0 parent  
CS57769 / Bay-0 parent

Relative  
Similarity

Genevestigator  
Experiment #

1.060 AT-00286  
1.038 AT-00168  
1.036 AT-00627  
1.035 AT-00026  
1.033 AT-00616  
1.031 AT-00667  
1.031 AT-00422  
1.031 AT-00216  
1.030 AT-00466  
1.030 AT-00669  
1.030 AT-00616  
1.028 AT-00216  
1.028 AT-00467  
1.028 AT-00490  
1.028 AT-00616  
1.027 AT-00616  
1.027 AT-00501  
1.027 AT-00024  
1.027 AT-00216  
1.027 AT-00216  
1.026 AT-00102  
1.026 AT-00216  
1.026 AT-00466  
1.025 AT-00216  
1.025 AT-00216  
1.025 AT-00216  
1.025 AT-00015  
1.025 AT-00216  
1.024 AT-00627  
1.024 AT-00627  
1.024 AT-00216  
1.024 AT-00352  
1.024 AT-00216  
1.024 AT-00216  
1.024 AT-00216  
1.024 AT-00669  
1.024 AT-00216  
1.023 AT-00604  
1.023 AT-00216  
1.023 AT-00525  
1.023 AT-00398  
1.023 AT-00216  
1.023 AT-00658  
1.023 AT-00216  
1.022 AT-00216  
1.022 AT-00102  
1.022 AT-00678  
1.022 AT-00216  
1.022 AT-00216  
1.022 AT-00216

**Fig S10: Differentially expressed genes in *p5cs1-4* control vs. W.T. control compared to public microarray data using the Genevestigator Signature analysis tool.**

A. Heat map with the *p5cs1-4* expression data along the top and 50 most similar datasets below. The most similar data sets were identified using the Euclidean Distance option in Genevestigator signatures comparison tool. The *p5cs1-4* data was compared to 3283 “perturbations” (experiments involving mutants, stress and hormone treatments).

B. The 50 samples most similar to *p5cs1-4* listed in the same order (top to bottom) and in A. The Genevestigator experiment number (AT-XXXXX) is listed for each.

Several of the samples with expression pattern most similar to *p5cs1-4* came from experiments involving light signaling mutants and different light treatments (AT-00627, AT-00616) or salicylic acid (SA) treatment (AT-00216).

Dataset: 3283 perturbations from data selection: AT\_AFPY\_A3761-0  
141 transcripts from gene selection: p5cs1 stress

A

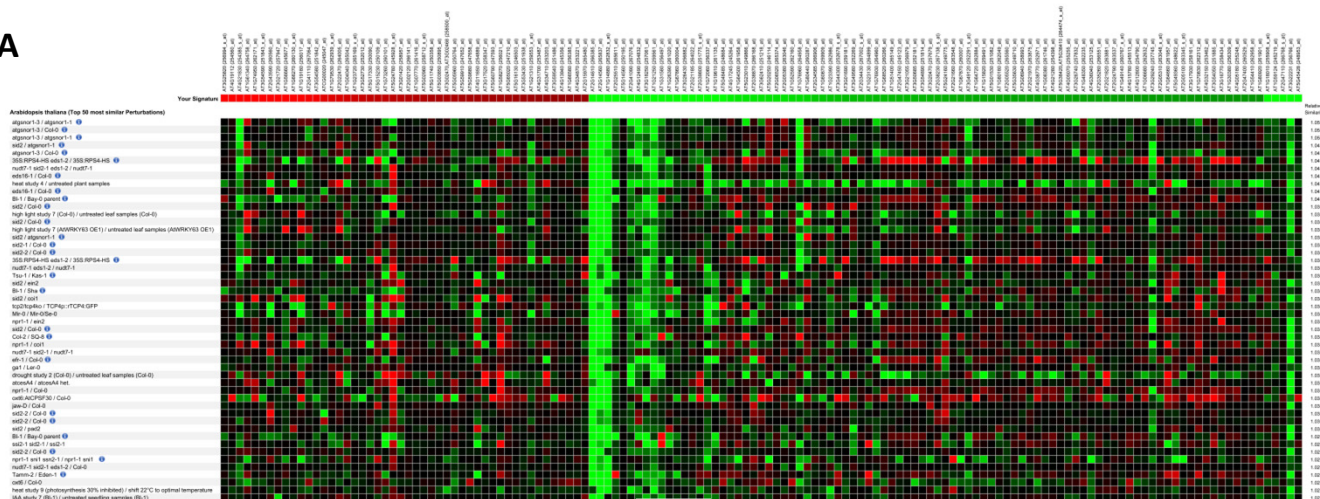

B

### Arabidopsis thaliana (Top 50 most similar Perturbations)

|                                                                                 | Relative milarity | Genevestigator Experiment # |
|---------------------------------------------------------------------------------|-------------------|-----------------------------|
| atgsnor1-3 / atgsnor1-1                                                         | 1.055             | AT-00393                    |
| atgsnor1-3 / Col-0                                                              | 1.052             | AT-00393                    |
| atgsnor1-3 / atgsnor1-1                                                         | 1.050             | AT-00393                    |
| sid2 / atgsnor1-1                                                               | 1.048             | AT-00393                    |
| atgsnor1-3 / Col-0                                                              | 1.045             | AT-00393                    |
| 35S:RPS4-HS eds1-2 / 35S:RPS4-HS                                                | 1.045             | AT-00665                    |
| nudt7-1 sid2-1 eds1-2 / nudt7-1                                                 | 1.044             | AT-00421                    |
| eds16-1 / Col-0                                                                 | 1.043             | AT-00614                    |
| heat study 4 / untreated plant samples                                          | 1.043             | AT-00387                    |
| eds16-1 / Col-0                                                                 | 1.043             | AT-00614                    |
| Bl-1 / Bay-0 parent                                                             | 1.040             | AT-00407                    |
| sid2 / Col-0                                                                    | 1.039             | AT-00393                    |
| high light study 7 (Col-0) / untreated leaf samples (Col-0)                     | 1.039             | AT-00618                    |
| sid2 / Col-0                                                                    | 1.039             | AT-00313                    |
| high light study 7 (AtWRKY63 OE1) / untreated leaf samples (AtWRKY63 OE1)       | 1.039             | AT-00618                    |
| sid2 / atgsnor1-1                                                               | 1.038             | AT-00393                    |
| sid2-1 / Col-0                                                                  | 1.037             | AT-00641                    |
| sid2-2 / Col-0                                                                  | 1.036             | AT-00641                    |
| 35S:RPS4-HS eds1-2 / 35S:RPS4-HS                                                | 1.036             | AT-00665                    |
| nudt7-1 eds1-2 / nudt7-1                                                        | 1.036             | AT-00421                    |
| Tsu-1 / Kas-1                                                                   | 1.036             | AT-00512                    |
| sid2 / ein2                                                                     | 1.035             | AT-00406                    |
| Bl-1 / Sha                                                                      | 1.034             | AT-00407                    |
| sid2 / coi1                                                                     | 1.034             | AT-00406                    |
| tcp2/tcp4ko / TCP4p::rTCP4:GFP                                                  | 1.034             | AT-00444                    |
| Mir-0 / Mir-0/Se-0                                                              | 1.034             | AT-00102                    |
| npr1-1 / ein2                                                                   | 1.033             | AT-00406                    |
| sid2 / Col-0                                                                    | 1.033             | AT-00406                    |
| Col-2 / SQ-8                                                                    | 1.033             | AT-00612                    |
| npr1-1 / coi1                                                                   | 1.033             | AT-00406                    |
| nudt7-1 sid2-1 / nudt7-1                                                        | 1.032             | AT-00421                    |
| efr-1 / Col-0                                                                   | 1.032             | AT-00597                    |
| ga1 / Ler-0                                                                     | 1.032             | AT-00131                    |
| drought study 2 (Col-0) / untreated leaf samples (Col-0)                        | 1.032             | AT-00292                    |
| atcesA4 / atcesA4 het.                                                          | 1.031             | AT-00426                    |
| npr1-1 / Col-0                                                                  | 1.031             | AT-00406                    |
| oxf6:AtCPSF30 / Col-0                                                           | 1.030             | AT-00242                    |
| jaw-D / Col-0                                                                   | 1.030             | AT-00445                    |
| sid2-2 / Col-0                                                                  | 1.030             | AT-00581                    |
| sid2-2 / Col-0                                                                  | 1.030             | AT-00581                    |
| sid2 / pad2                                                                     | 1.030             | AT-00406                    |
| Bl-1 / Bay-0 parent                                                             | 1.029             | AT-00407                    |
| ssi2-1 sid2-1 / ssi2-1                                                          | 1.029             | AT-00630                    |
| sid2-2 / Col-0                                                                  | 1.029             | AT-00661                    |
| npr1-1 sni1 ssn2-1 / npr1-1 sni1                                                | 1.029             | AT-00471                    |
| nudt7-1 sid2-1 eds1-2 / Col-0                                                   | 1.029             | AT-00421                    |
| Tamm-2 / Eden-1                                                                 | 1.028             | AT-00613                    |
| oxf6 / Col-0                                                                    | 1.028             | AT-00242                    |
| heat study 9 (photosynthesis 30% inhibited) / shift 22°C to optimal temperature | 1.027             | AT-00500                    |
| IAA study 7 (Bl-1) / untreated seedling samples (Bl-1)                          | 1.027             | AT-00407                    |

### Fig S11: Differentially expressed genes in *p5cs1-4* stress vs. W.T. stress compared to public microarray data using the Genevestigator Signature analysis tool.

A. Heat map with the *p5cs1-4* expression data along the top and 50 most similar datasets below. The most similar data sets were identified using the Euclidean Distance option in Genevestigator signatures comparison tool. The *p5cs1-4* data was compared to 3283 “perturbations” (experiments involving mutants, stress and hormone treatments).

B. The 50 samples most similar to *p5cs1-4* listed in the same order (top to bottom) and in A. The Genevestigator experiment number (AT-XXXXX) is listed for each.

The samples most similar to *p5cs1-4* were from experiments involving *Pseudomonas syringae* inoculation of *atgsnor* (S-nitrosoglutathione reductase) mutants (Genevestigator experiment number AT-00393. Other experiments with some similarity in expression pattern compared to *p5cs1-4* involved mutants involved in salicylic acid (SA) synthesis (*sid2*) or SA-related signaling (*ssi2*, *npr1*) as well as other pathogen-related signaling mutants or overexpression lines (*eds1*, *RPS4*, *nudt7*).

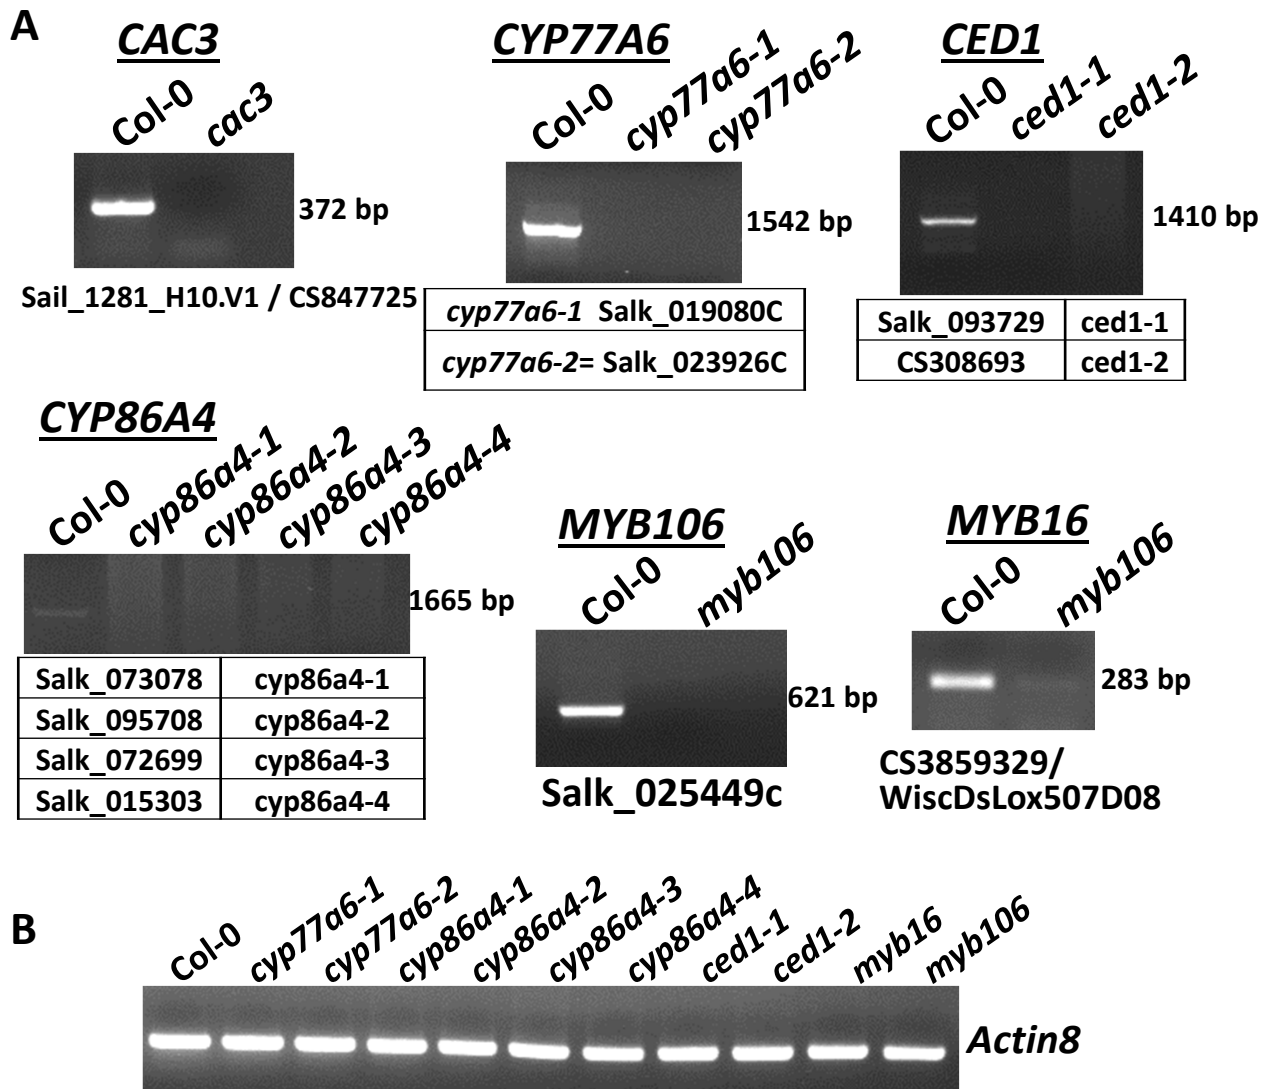

**Figure S12: RT-PCR check of lipid- and cuticle-related T-DNA mutants.**

- A. RT-PCR analysis of T-DNA lines. Mutants used, and size of the fragment amplified are indicated. Primers used for the RT-PCR analysis are given in Supplemental Table S12.
- B. Amplification of Actin8 reference gene in all samples used in A.
